# Supplementary material for: Acceptability of the COVID-19 Vaccine among Adults in Saudi Arabia: A Cross-Sectional Study of the General Population in the Southern Region of Saudi Arabia
Source: MDPI journal article supplement (doi:10.3390/vaccines10010041), 2021-12-29
Supplement: s1 [file s1]

## T-test results of group differences on vaccine acceptability

**Table S1.** Group differences of male and female on vaccine acceptability.

| Gender                                  |                             | N                            | Mean  | Standard Deviation | Standard Error Mean |                 |                 |                           |        |       |
|-----------------------------------------|-----------------------------|------------------------------|-------|--------------------|---------------------|-----------------|-----------------|---------------------------|--------|-------|
| Vaccine acceptability                   | Male                        | 270                          | 1.630 | 0.430              | 0.026               |                 |                 |                           |        |       |
|                                         | Female                      | 121                          | 1.606 | 0.432              | 0.039               |                 |                 |                           |        |       |
| Levene's Test for Equality of Variances |                             | t-test for Equality of Means |       |                    |                     |                 |                 |                           |        |       |
|                                         |                             | F                            | Sig.  | t                  | df                  | Sig. (2-tailed) | Mean Difference | Standard Error Difference | 95% CI |       |
|                                         |                             |                              |       |                    |                     |                 |                 |                           | Lower  | Upper |
| Vaccine acceptability                   | Equal variances assumed     | 0.168                        | 0.682 | 0.501              | 389.000             | 0.617           | 0.024           | 0.047                     | -0.069 | 0.116 |
|                                         | Equal variances not assumed |                              |       | 0.499              | 229.535             | 0.618           | 0.024           | 0.047                     | -0.069 | 0.117 |

**Table S2.** Group differences between Saudi and non-Saudi for Vaccine acceptability.

| Nationality           |                             | N                                       |      | Mean |      | Standard Deviation           |                 | Standard Error Mean       |        |       |
|-----------------------|-----------------------------|-----------------------------------------|------|------|------|------------------------------|-----------------|---------------------------|--------|-------|
| Vaccine acceptability | Saudi                       | 375                                     |      | 1.62 |      | 0.42                         |                 | 0.02                      |        |       |
|                       | Non-Saudi                   | 16                                      |      | 1.60 |      | 0.47                         |                 | 0.11                      |        |       |
|                       |                             | Levene's Test for Equality of Variances |      |      |      | t-test for Equality of Means |                 |                           |        |       |
|                       |                             | F                                       | Sig. | t    | df   | Sig. (2-tailed)              | Mean Difference | Standard Error Difference | 95% CI |       |
|                       |                             |                                         |      |      |      |                              |                 |                           | Lower  | Upper |
| Vaccine acceptability | Equal variances assumed     | 1.52                                    | 0.21 | 0.17 | 389  | 0.86                         | 0.01            | 0.10                      | -0.19  | 0.23  |
|                       | Equal variances not assumed |                                         |      | 0.15 | 16.0 | 0.87                         | 0.01            | 0.12                      | -0.23  | 0.27  |

**Table S3.** Vaccine acceptability differences between medical and non-medical professionals.

| Profession            |                         | N                                       |      | Mean |     | Standard Deviation           |                 | Standard Error Mean       |        |      |
|-----------------------|-------------------------|-----------------------------------------|------|------|-----|------------------------------|-----------------|---------------------------|--------|------|
| Vaccine acceptability | Medical                 | 141                                     |      | 1.62 |     | 0.43                         |                 | 0.03                      |        |      |
|                       | Non-medical             | 250                                     |      | 1.62 |     | 0.42                         |                 | 0.02                      |        |      |
|                       |                         | Levene's Test for Equality of Variances |      |      |     | t-test for Equality of Means |                 |                           |        |      |
|                       |                         | F                                       | Sig. | t    | df  | Sig. (2-tailed)              | Mean Difference | Standard Error Difference | 95% CI |      |
| Vaccine acceptability | Equal variances assumed | 0.19                                    | 0.66 | 0.06 | 389 | 0.95                         | 0.003           | 0.04                      | -0.08  | 0.09 |

|                                |      |       |      |       |      |       |      |
|--------------------------------|------|-------|------|-------|------|-------|------|
| Equal variances<br>not assumed | 0.06 | 287.1 | 0.95 | 0.003 | 0.04 | -0.08 | 0.09 |
|--------------------------------|------|-------|------|-------|------|-------|------|

**Table S4.** Vaccine acceptability differences between careless and careful about health.

| Degree of carefulness about health |                             | N                                       | Mean |      | Standard Deviation |                              | Standard Error Mean |                           |        |       |
|------------------------------------|-----------------------------|-----------------------------------------|------|------|--------------------|------------------------------|---------------------|---------------------------|--------|-------|
| Vaccine acceptability              | Careful                     | 344                                     | 1.63 |      | 0.42               |                              | 0.02                |                           |        |       |
|                                    | Careless                    | 47                                      | 1.56 |      | 0.43               |                              | 0.06                |                           |        |       |
|                                    |                             | Levene's Test for Equality of Variances |      |      |                    | t-test for Equality of Means |                     |                           |        |       |
|                                    |                             | F                                       | Sig. | t    | df                 | Sig. (2-tailed)              | Mean Difference     | Standard Error Difference | 95% CI |       |
|                                    |                             |                                         |      |      |                    |                              |                     |                           | Lower  | Upper |
| Vaccine acceptability              | Equal variances assumed     | 0.43                                    | 0.51 | 0.93 | 389.0              | 0.35                         | 0.06                | 0.06                      | -0.06  | 0.19  |
|                                    | Equal variances not assumed |                                         |      | 0.91 | 58.63              | 0.36                         | 0.06                | 0.06                      | -0.07  | 0.19  |
